# Supplementary material for: Protein Regulator of Cytokinesis 1 (PRC1) Upregulation Promotes Immune Suppression in Liver Hepatocellular Carcinoma
Source: Hindawi journal article supplement (doi:10.1155/2022/7073472), 2022-08-09
Supplement: f1 [file 7073472.f1.pdf]

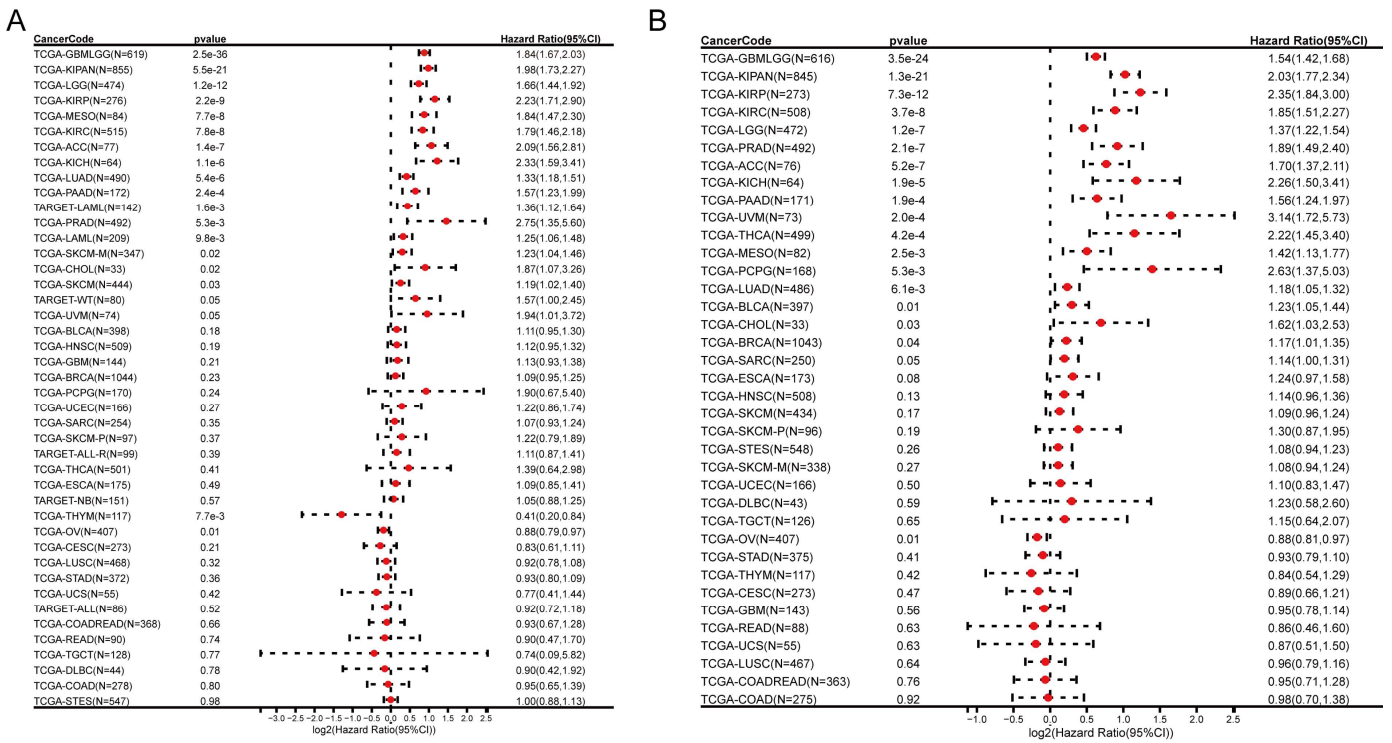

Supplementary Figure 1. The pan-cancer prognostic value of PRC1

A. A forest diagram shows the pan-cancer correlation between PRC1 expression and OS.

B. A forest diagram shows the pan-cancer correlation between PRC1 expression and PFI.

Supplementary Table 1. The sample characteristic statistics of GSE84402 dataset

| Characteristic     | cancertissue     | non-canceroustissue | p     |
|--------------------|------------------|---------------------|-------|
| n                  | 14               | 14                  |       |
| hbsag, n (%)       |                  |                     | 1.000 |
| negative           | 1 (3.6%)         | 1 (3.6%)            |       |
| positive           | 13 (46.4%)       | 13 (46.4%)          |       |
| gender, n (%)      |                  |                     | 1.000 |
| female             | 5 (17.9%)        | 5 (17.9%)           |       |
| male               | 9 (32.1%)        | 9 (32.1%)           |       |
| age, mean $\pm$ SD | 47.69 $\pm$ 9.92 | 47.69 $\pm$ 9.92    | 1.000 |

Supplementary Table 2. The expression of the top 300 PRC1 co-expressed genes in LIHC dataset in TCGA database

| gene      | Log2FC      | gene       | Log2FC      |
|-----------|-------------|------------|-------------|
| BUB1B     | 0.684333368 | ZWINT      | 0.513144342 |
| KIF23     | 0.859827215 | CCNA2      | 0.194279504 |
| CKAP2L    | 0.662927038 | RACGAP1    | 0.600337428 |
| ARHGAP11A | 0.530113597 | WDHD1      | 0.557225073 |
| NUSAP1    | 0.452746956 | AC099850.3 | 0.78811344  |
| TOP2A     | 0.758353631 | DEPDC1     | 0.762905353 |
| KIF18B    | 0.665194448 | TCF19      | 0.456979877 |
| FANCI     | 0.486302827 | CENPL      | 0.539285211 |
| ANLN      | 0.924572728 | ATAD5      | 0.434474133 |
| FOXM1     | 0.547705404 | AC091057.1 | 0.475941016 |
| KIF18A    | 0.741723356 | DTL        | 0.475850981 |
| BUB1      | 0.752744257 | HELLS      | 0.519462748 |
| TPX2      | 0.716879792 | SKA3       | 0.440290342 |
| KIF11     | 0.705653533 | NDC80      | 0.603510129 |
| KIFC1     | 0.643708728 | EZH2       | 0.41750497  |
| POLQ      | 0.652941671 | PRR11      | 0.861723505 |
| KIF4A     | 0.747388251 | NCAPG2     | 0.382036237 |
| TICRR     | 0.593424262 | CDCA2      | 0.819871047 |
| E2F8      | 0.369028049 | MCM2       | 0.49747493  |
| NCAPH0    | 0.743188771 | ASF1B      | 0.634997052 |
| SGO2      | 0.671210601 | KNTC1      | 0.511397195 |
| OIP5      | 0.41277369  | WDR760     | 0.381611643 |
| CENPF     | 0.68165795  | HASPIN     | 0.510929925 |
| CDCA8     | 0.641631396 | MAD2L1     | 0.656280951 |
| NCAPG0    | 0.61302592  | EME1       | 0.5193216   |
| CENPI     | 0.712138895 | ASPM       | 0.620829091 |
| CDK1      | 0.699164631 | TRIP13     | 0.667102073 |
| HJURP     | 0.703444779 | CEP55      | 0.978111473 |
| GTSE1     | 0.715364772 | CDC6       | 0.741029374 |
| MELK      | 0.640516629 | DEPDC1B    | 0.835381528 |
| CENPE     | 0.762804349 | ZWILCH     | 0.18794166  |
| MCM100    | 0.71600505  | SPC25      | 0.539333113 |
| RAD51AP1  | 0.450228624 | FAM72B     | 0.580196376 |
| CENPK     | 0.427419683 | RRM2       | 0.462637565 |
| STIL      | 0.551929804 | CDCA5      | 0.592500023 |
| FANCD2    | 0.49830215  | TROAP      | 0.703322675 |
| NEK2      | 0.617518664 | HMMR       | 0.468944271 |
| ERCC6L    | 0.753608235 | RAD51      | 0.484322594 |
| GINS1     | 0.542130598 | WDR620     | 0.636712163 |
| CCNB2     | 0.566808874 | PBK        | 0.612972775 |
| ECT2      | 0.609155174 | CCNB1      | 0.53277189  |
| PLK4      | 0.589155238 | KIF2C      | 0.850629865 |
| KIF20A    | 0.666342435 | CDC45      | 0.587820737 |
| DLGAP5    | 0.842234397 | CENPA      | 0.82550885  |
| MKI67     | 0.714459478 | CCNF       | 0.517905327 |
| SGO1      | 0.603345374 | CLSPN      | 0.735642476 |
| NUF2      | 0.713201875 | SKA1       | 0.834921388 |
| CIP2A     | 0.729293151 | C5orf340   | 0.410339336 |
| RAD54L    | 0.809560913 | RBL1       | 0.512606308 |
| LMNB1     | 0.388404628 | BARD1      | 0.572677153 |
| PARPBP    | 0.40776461  | BRCA1      | 0.381392881 |
| TTK       | 0.699862747 | KIF20B     | 0.343531518 |
| XRCC2     | 0.453887448 | ORC1       | 0.616479031 |
| UHRF1     | 0.698796057 | ORC6       | 0.638443613 |
| GPSM20    | 0.623014156 | PCLAF      | 0.549284804 |
| KIF14     | 0.700107334 | E2F2       | 0.708964857 |
| EXO1      | 0.705120252 | CDCA3      | 0.562907112 |
| KIF15     | 0.631061966 | PSMC3IP    | 0.362717635 |
| PLK1      | 0.829446028 | HROB       | 0.365176912 |
| SPDL1     | 0.318724888 | PIF1       | 0.522665609 |

Supplementary Table 2. The expression of the top 300 PRC1 co-expressed genes in LIHC dataset in TCGA database

| gene       | Log2FC      | gene     | Log2FC      |
|------------|-------------|----------|-------------|
| DBF4B      | 0.312861993 | TOPBP1   | 0.256128487 |
| ESCO2      | 0.59095814  | DONSON   | 0.160810857 |
| FAM72A     | 0.489266959 | TIMELESS | 0.170146779 |
| NCAPD2     | 0.474152866 | TYMS     | 0.488545452 |
| MCM6       | 0.440892003 | EMC3-AS1 | 0.489691484 |
| DNMT1      | 0.320508855 | POLA1    | 0.396159007 |
| KNSTRN     | 0.162258725 | FBXO43   | 0.222177667 |
| MMS22L     | 0.42630918  | DNAJC9   | 0.124935469 |
| CHAF1B     | 0.705531467 | E2F1     | 0.486651945 |
| PKMYT1     | 0.638191771 | MSH2     | 0.245395539 |
| SHCBP1     | 0.905898567 | FAM111B  | 0.328591578 |
| HMGB2      | 0.324668771 | FEN1     | 0.255979766 |
| FANCB      | 0.538410002 | MCM7     | 0.447840648 |
| GAS2L3     | 0.689716393 | CENPU    | 0.485627941 |
| MCM8       | 0.3797564   | LIN9     | 0.393337312 |
| CIT        | 0.549822453 | MTBP     | 0.2538593   |
| FANCG      | 0.289033339 | POLD1    | 0.315802104 |
| TACC3      | 0.54729995  | CDCA4    | 0.40559456  |
| BRCA2      | 0.332222789 | ESPL1    | 0.525307336 |
| AC112777.1 | 0.792726575 | CKAP5    | 0.141167456 |
| CDC25C     | 0.443969961 | CEP152   | 0.333432933 |
| BIRC5      | 0.759817598 | PRIM2    | 0.213199372 |
| ARHGEF39   | 0.428619846 | SPATS2   | 0.343551221 |
| CHEK1      | 0.450443085 | MASTL    | 0.256974232 |
| KPNA2      | 0.447695464 | MIS18A   | 0.225303952 |
| NEMP1      | 0.331128778 | DDIAS    | 0.495990458 |
| MYO190     | 0.306509133 | CDC7     | 0.464400293 |
| MCM3       | 0.338981505 | DIAPH3   | 0.110007735 |
| CDKN3      | 0.404920472 | RRM1     | 0.195258786 |
| RFC4       | 0.354407536 | TUBA1B   | 0.353294984 |
| LIG1       | 0.221009286 | PHF19    | 0.505145027 |
| MYBL2      | 0.820969949 | RHNO1    | 0.254681653 |
| KIF24      | 0.506677283 | AURKB    | 0.666968819 |
| CENPH      | 0.355390148 | SMC4     | 0.39934797  |
| SPAG5      | 0.352220162 | TRIM59   | 0.540154988 |
| MCM4       | 0.273079731 | CENPM    | 0.677701964 |
| CHAF1A     | 0.199541335 | KIAA1841 | 0.340377372 |
| BLM        | 0.435922861 | ILF3     | 0.150327495 |
| C21orf58   | 0.330795032 | NUP107   | 0.210654255 |
| INCENP     | 0.306175197 | CPSF6    | 0.203906588 |
| NSD2       | 0.229563681 | E2F7     | 0.734645372 |
| DBF4       | 0.323179365 | NUP155   | 0.156234556 |
| CDT1       | 0.462349172 | CCNE2    | 0.563784259 |
| RFC5       | 0.170079098 | FBXO5    | 0.546071296 |
| UBE2C      | 0.860527665 | SASS6    | 0.316272537 |
| MCM5       | 0.232023914 | NDC1     | 0.281008653 |
| C4orf46    | 0.40510741  | RAD1     | 0.121656505 |
| DSN1       | 0.176314324 | CKAP2    | 0.327110238 |
| CDC25A     | 0.522759413 | SMPD4    | 0.122767118 |
| CDC20      | 0.853128835 | CENPQ    | 0.286966296 |
| GINS4      | 0.412340466 | XRCC3    | 0.173742995 |
| CBX1       | 0.240493363 | GINS3    | 0.383538974 |
| MTFR2      | 0.612737333 | SUZ12    | 0.151560983 |
| STMN1      | 0.399717996 | PCNA     | 0.28385525  |
| UBE2T      | 0.490494804 | ACTL6A   | 0.197693145 |
| CENPO      | 0.48005077  | SMC2     | 0.379873349 |
| CDK2       | 0.263741621 | AURKA    | 0.130931264 |
|            |             | RTKN2    | 0.503678767 |
|            |             | TRAIP    | 0.530491055 |
|            |             | ZNF207   | 0.13051535  |

Supplementary Table 2. The expression of the top 300 PRC1 co-expressed genes in LIHC dataset in TCGA database

| gene     | Log2FC      |
|----------|-------------|
| RAD18    | 0.209832774 |
| MGME1    | 0.087412552 |
| TMPO     | 0.052291687 |
| CASP2    | 0.227390702 |
| NUP205   | 0.231517871 |
| BRIP1    | 0.30006232  |
| DDX12P   | 0.255162991 |
| HNRNPL   | 0.094348352 |
| DNA2     | 0.299160714 |
| GMPS     | 0.166080593 |
| USP1     | 0.348903215 |
| NEDD1    | 0.241116893 |
| SLC25A19 | 0.280724894 |
| TEDC2    | 0.521287938 |
| ANKLE2   | 0.135860882 |
| SUV39H2  | 0.188547429 |
| CEP250   | 0.16231527  |
| HNRNPA3  | 0.086087087 |
| H2AZ1    | 0.324909617 |
| RMI2     | 0.510035388 |
| RNF34    | 0.171478287 |
| TTF2     | 0.283476602 |
| SMARCD1  | 0.165622024 |
| NUP85    | 0.224538612 |
| HSPA14   | 0.187164069 |
| CBFA2T2  | 0.147757081 |
| NEIL3    | 0.75511675  |
| NDE1     | 0.317495984 |
| RFC3     | 0.13637812  |
| LMNB2    | 0.595731941 |
| SSRP1    | 0.137094717 |
| CEP78    | 0.212247915 |
| DCLRE1B  | 0.274548949 |
| RFWD30   | 0.238032072 |
| ARHGAP33 | 0.365949268 |
| PTTG1    | 0.667542427 |
| RAD51D   | 0.267616837 |
| MYBL1    | 0.402312084 |
| TUBG1    | 0.186692019 |
| TMPO-AS1 | 0.083050322 |
| BORA     | 0.276015672 |
| AUNIP    | 0.547065961 |
| CENPJ    | 0.359279181 |
| MAPKAPK5 | 0.077530171 |
| SLBP     | 0.119680496 |
| ZNF724   | 0.311972803 |
| SRRT     | 0.12913508  |
| KPNB1    | 0.233628062 |
| NRM      | 0.577063029 |
| U2SURP   | 0.087106183 |
| COMMD2   | 0.057439966 |
| PRKCI    | 0.183288954 |
| TTI1     | 0.087460276 |
| SRSF2    | 0.062384168 |
| ZGRF1    | 0.340022672 |
| SENP1    | 0.149003245 |
| FANCE    | 0.404489732 |
| POLD3    | 0.200412941 |

| gene      | Log2FC      |
|-----------|-------------|
| VRK1      | 0.170551953 |
| MACROH2A1 | 0.13858448  |
| PPHLN1    | 0.09484003  |
| SART3     | 0.098679921 |
| USP39     | 0.127652446 |
